# Supplementary material for: Cost-effective and sensitive anthocyanin-based paper sensors for rapid ammonia detection in aqueous solutions
Source: Royal Society of Chemistry journal article supplement (doi:10.1039/d1ra04069c), 2021-01-01
Supplement: d1ra04069c1.pdf [file d1ra04069c1.pdf]

*Supporting Information for*

**Cost-Effective and Sensitive Anthocyanin-Based Paper Sensors for  
Rapid Ammonia Detection in Aqueous Solutions**

Shamshad Ul Haq, Maryam Aghajamali, Hassan Hassanzadeh \*

Department of Chemical and Petroleum Engineering, University of Calgary, Alberta, Canada

---

\* Corresponding Author: E-mail (H. Hassanzadeh): [hhassanz@ucalgary.ca](mailto:hhassanz@ucalgary.ca)

### **Reagent Preparation:**

Reagents were prepared as per Phenate Method (4500-NH<sub>3</sub> F) with minor modifications.<sup>1</sup>

**Ammonium stock and standard solutions.** Ammonium chloride (NH<sub>4</sub>Cl) powder was dried in an oven at 100 °C for one hour before use. Dried NH<sub>4</sub>Cl (3.819 g) was dissolved in 1,000 ml of deionized water to prepare the stock solution with a concentration of 1,000 mg NH<sub>3</sub>-N/L. The standard solutions in the range of 0.01 to 20 mg NH<sub>3</sub>-N/L were prepared by the serial dilution of the stock solution before the analysis.

**Phenol solution:** This solution was prepared by adding phenol (11.877 g) into a 100 ml volumetric flask, followed by adding ethyl alcohol (95%) to reach the final volume.

**Sodium nitroprusside solution:** The catalyst solution was prepared by dissolving sodium nitroprusside (0.5688 g) in 100 ml of deionized water. This solution was stored in a screw-capped amber color bottle at 4 °C, and it can be used for up to one month.

**Alkaline citrate solution:** This solution was prepared by adding sodium citrate dihydrate (227.93 g) and sodium hydroxide (10 g) in 1,000 ml of deionized water.

**Oxidizing solution:** The oxidizing solution is a mixture of alkaline citrate and sodium hypochlorite (5%) solutions in 4:1 ratio; 100 ml of alkaline citrate solution was mixed with 25 ml of sodium hypochlorite solution. This solution should be prepared daily before use.

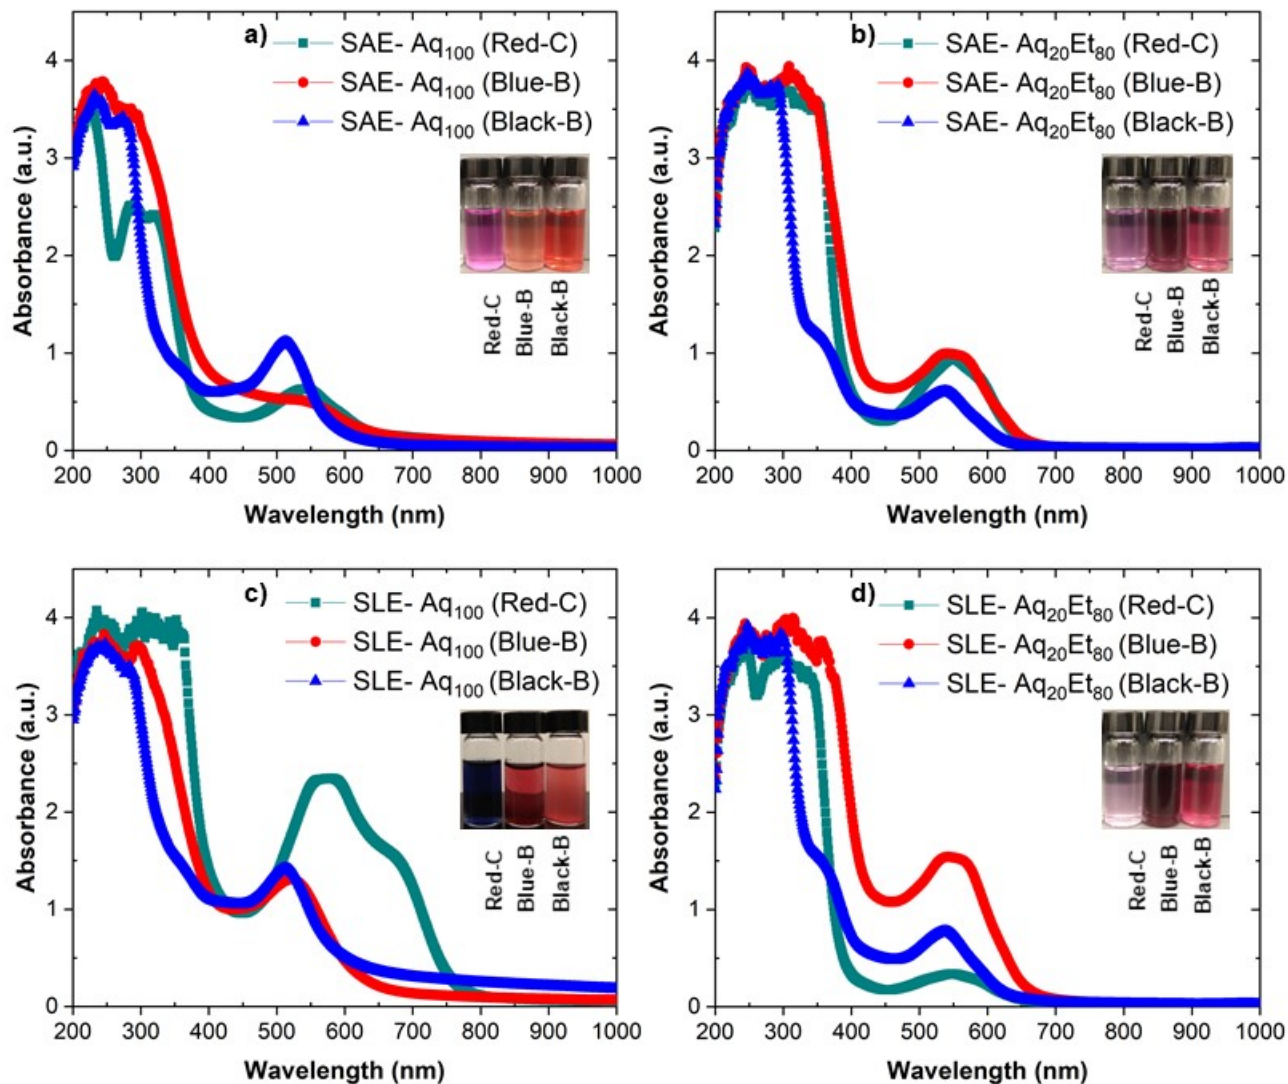

**Figure S1:** UV-Vis spectra of anthocyanin extracted from blackberry (Black-B), blueberry (Blue-B), and red cabbage (Red-C): (a) and (b) sonication assisted extraction (SAE) in deionized water (Aq<sub>100</sub>) and 80% aqueous ethanolic solution (Aq<sub>20</sub>Et<sub>80</sub>). (c) and (d) solid-liquid extraction (SLE) in deionized water (Aq<sub>100</sub>) and 80% aqueous ethanolic solution (Aq<sub>20</sub>Et<sub>80</sub>). Photos of vials containing anthocyanin extracts are shown as insets.

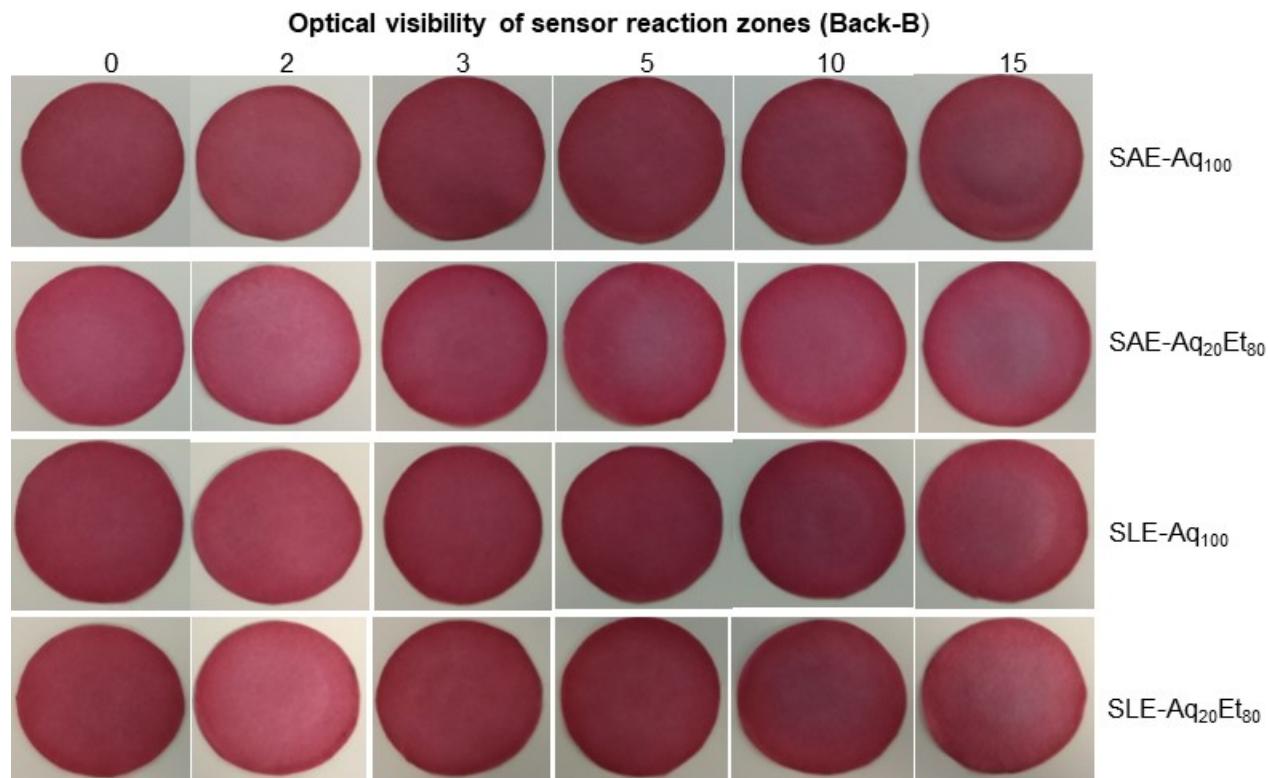

**Figure S2:** Photos of Black-B anthocyanin-based paper sensors after exposure to different ammonia concentrations (2, 3, 5, 10, and 15 NH<sub>3</sub>-N/L). 0 represents the blank sample.

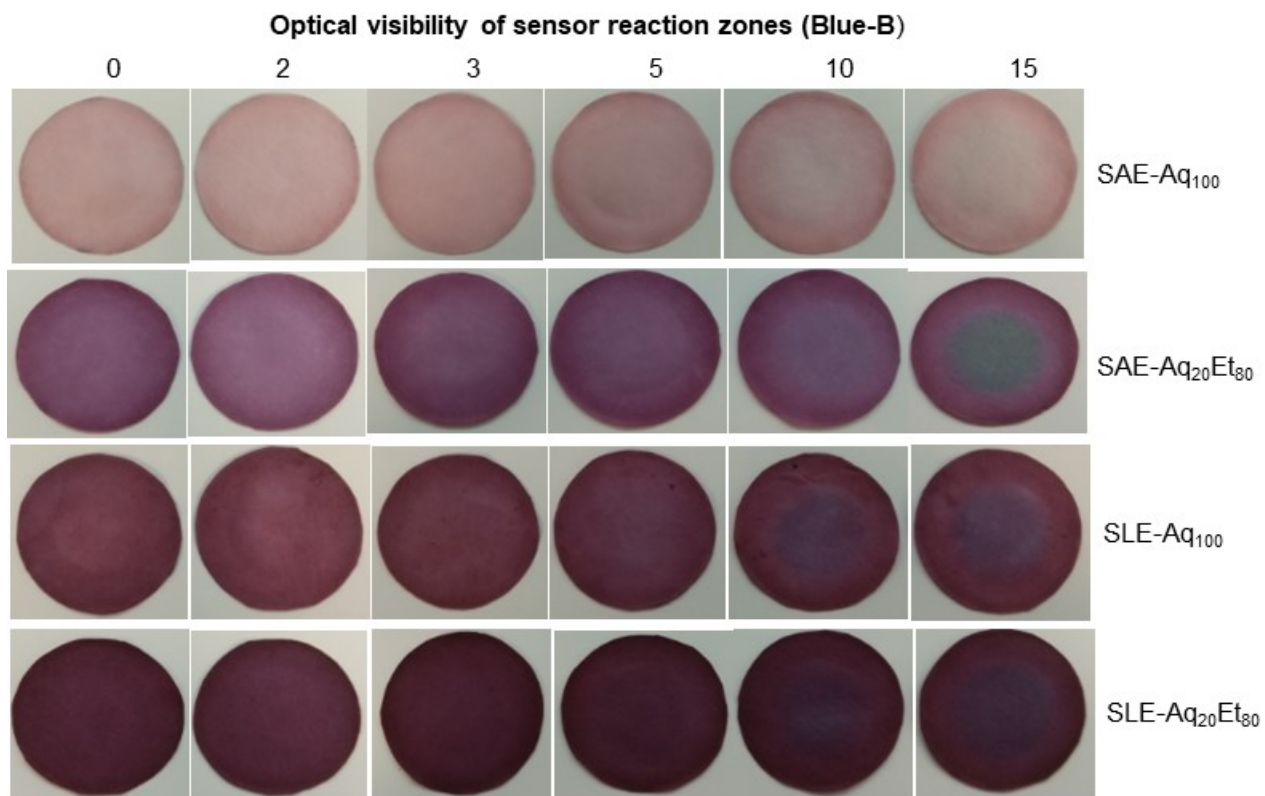

**Figure S3:** Photos of Blue-B anthocyanin-based paper sensors after exposure to different ammonia concentrations (2, 3, 5, 10, and 15 NH<sub>3</sub>-N/L). 0 represents the blank sample.

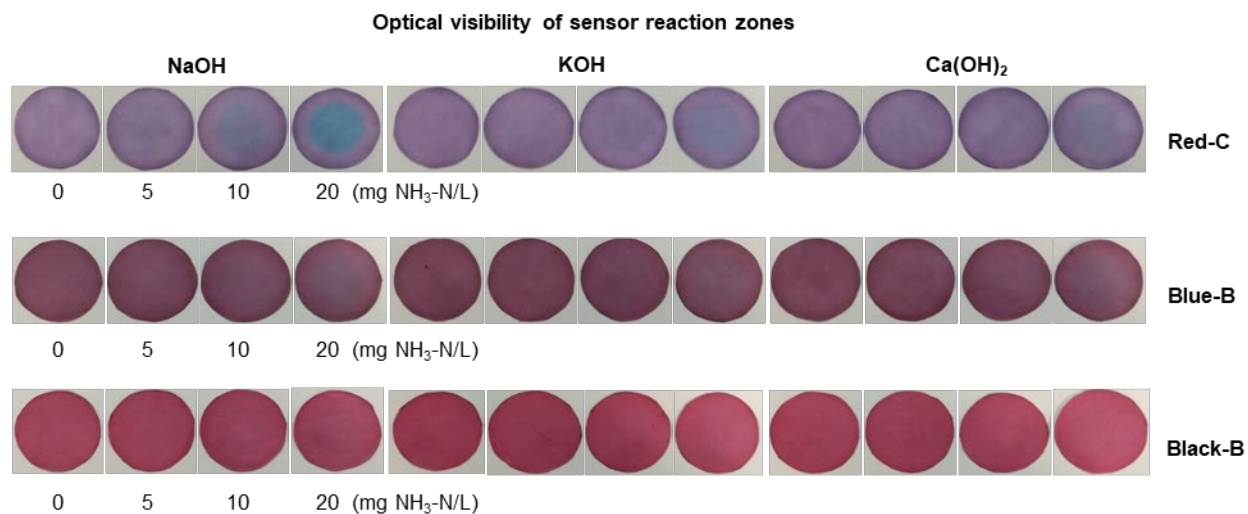

**Figure S4:** Photos of sensors fabricated from different sources (Red-C, Blue-B, and Black-B) after exposure to the released ammonia gas, following alkalization with NaOH, KOH, and Ca(OH)<sub>2</sub> at 5, 10 and 20 mg NH<sub>3</sub>-N/L (0 represents the blank sample).

**Reference:**

- (1) Baird, R. B.; Rice, C. E. W.; Eaton, A. D. Standard Methods for the Examination of Water and Wastewater, 23rd ed.; Water Environment Federation, American Public Health Association, American Water Works Association, 2017.
